# Supplementary material for: EGFR-Tyrosine Kinase Inhibitors Induced Activation of the Autocrine CXCL10/CXCR3 Pathway through Crosstalk between the Tumor and the Microenvironment in EGFR-Mutant Lung Cancer
Source: MDPI journal article supplement (doi:10.3390/cancers15010124), 2022-12-25
Supplement: s1 [file s1]

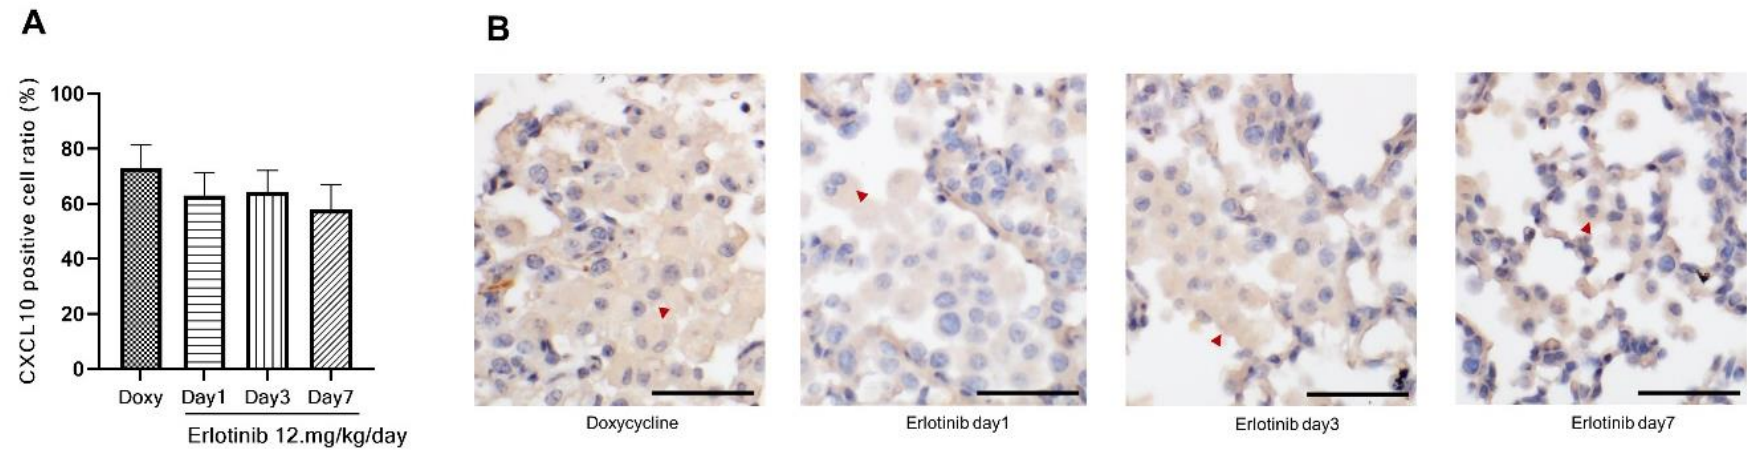

**Figure S2.** The expression of CXCL10 in alveolar macrophage after erlotinib (12.5 mg/kg) treatment as indicated. **(A)** Proportion of CXCL10-expressed macrophage according to erlotinib treatment on day 1 ( $n = 5$ , 3 male and 2 female), day 3 ( $n = 7$ , 5 male and 2 female), day 7 ( $n = 7$ , 5 male and 2 female), and no treatment ( $n = 5$ , 3 male and 2 female). Data are presented as mean  $\pm$  SD. **(B)** Representative immunohistochemical staining of CXCL10 in alveolar macrophage (Red arrow head macrophage, scale bar 50  $\mu$ m).
