# Supplementary material for: EGFR-Tyrosine Kinase Inhibitors Induced Activation of the Autocrine CXCL10/CXCR3 Pathway through Crosstalk between the Tumor and the Microenvironment in EGFR-Mutant Lung Cancer
Source: MDPI journal article supplement (doi:10.3390/cancers15010124), 2022-12-25
Supplement: s1 [file s1]

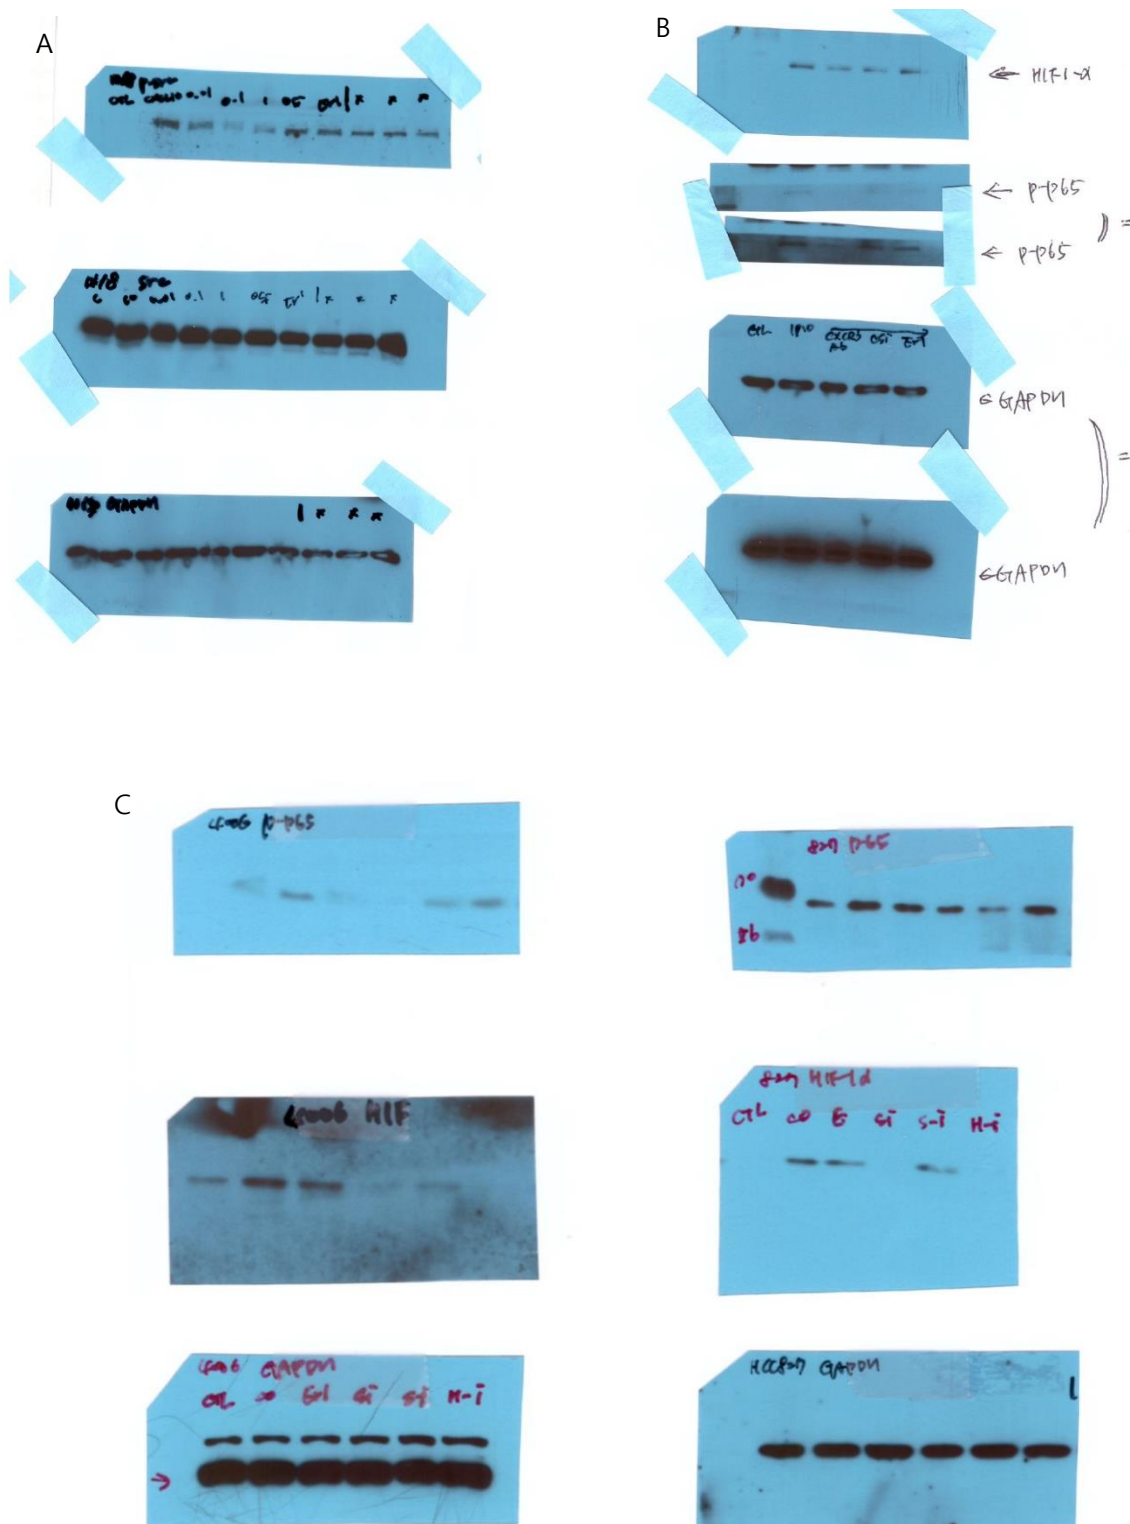

**Figure S1.** Whole blots showing all the bands with all molecular weight markers (A) Figure 3A; (B) Figure 3B; (C) Figure 4D.
