# Supplementary material for: EGFR-Tyrosine Kinase Inhibitors Induced Activation of the Autocrine CXCL10/CXCR3 Pathway through Crosstalk between the Tumor and the Microenvironment in EGFR-Mutant Lung Cancer
Source: MDPI journal article supplement (doi:10.3390/cancers15010124), 2022-12-25
Supplement: s1 [file s1]

Supplementary Table S1. Quantification cytokine array analysis of supernatant derived from co-culture during EGFR-TKI therapy.

| Co-culture    | –     | –     | +     | +     | Cell line |
|---------------|-------|-------|-------|-------|-----------|
| Erlotinib     | –     | +     | –     | +     |           |
| CCL2          | 0.974 | 1.054 | 0.928 | 0.934 | HCC4006   |
|               | 0     | 0     | 0     | 0     | HCC827    |
|               | 1.083 | 1.010 | 1.011 | 0.854 | A549      |
|               | 0.880 | 0.970 | 0.960 | 0.879 | H1975     |
| CCL5          | 0     | 0     | 0     | 0     | HCC4006   |
|               | 0     | 0     | 0     | 0     | HCC827    |
|               | 1.037 | 0.921 | 1.015 | 0.888 | A549      |
|               | 0     | 0     | 0.965 | 0.786 | H1975     |
| CXCL1         | 0.721 | 0.623 | 0.719 | 0.449 | HCC4006   |
|               | 0.391 | 0     | 0.745 | 0.610 | HCC827    |
|               | 0.705 | 0.755 | 0.600 | 0.536 | A549      |
|               | 0.731 | 0.739 | 0.783 | 0.608 | H1975     |
| CXCL10        | 0     | 0     | 0.892 | 0.750 | HCC4006   |
|               | 0     | 0     | 0.754 | 0.770 | HCC827    |
|               | 0     | 0     | 0.552 | 0.409 | A549      |
|               | 0     | 0     | 0.938 | 0.836 | H1975     |
| ICAM1         | 0     | 0     | 0.788 | 0.648 | HCC4006   |
|               | 0     | 0     | 0.674 | 0.525 | HCC827    |
|               | 0     | 0     | 0.616 | 0.326 | A549      |
|               | 0     | 0     | 0.835 | 0.755 | H1975     |
| IFN- $\gamma$ | 0     | 0     | 0.771 | 0.684 | HCC4006   |
|               | 0     | 0     | 0.152 | 0     | HCC827    |
|               | 0     | 0     | 0.841 | 0.684 | A549      |
|               | 0     | 0     | 0.847 | 0.732 | H1975     |
| IL-6          | 0     | 0     | 0.829 | 0.699 | HCC4006   |
|               | 0     | 0     | 0.794 | 0.649 | HCC827    |
|               | 0.894 | 0.861 | 0.889 | 0.775 | A549      |
|               | 0     | 0     | 0.847 | 0.820 | H1975     |
| IL-8          | 0.873 | 1.022 | 0.954 | 0.883 | HCC4006   |
|               | 0.619 | 0.433 | 0.880 | 0.774 | HCC827    |
|               | 0.945 | 0.900 | 0.762 | 0.674 | A549      |
|               | 0.985 | 1.021 | 0.847 | 0.739 | H1975     |
